# Supplementary material for: Inducing hierarchical pores in nano-MOFs for efficient gas separation
Source: Royal Society of Chemistry journal article supplement (doi:10.1039/d3ra01175e), 2023-01-01
Supplement: d3ra01175e1.pdf [file d3ra01175e1.pdf]

## Supplementary information

### Inducing hierarchical pores in nano-MOFs for efficient gas separation

Kritika Narang Landström<sup>1</sup>, Ashwin Nambi<sup>2</sup>, Andreas Kaiser<sup>2</sup> and Farid Akhtar<sup>1,\*</sup>

<sup>1</sup> Division of Materials Science, Luleå University of Technology, Luleå 97187, Sweden

<sup>2</sup> Department of Energy Conversion and Storage, Technical University of Denmark, 2800 Kgs. Lyngby, Denmark

\* Correspondence: farid.akhtar@ltu.se

Additional MOF synthesis protocols:

Table 1S: Protocols of Cu-MOFs synthesized in this work.

| <b>Protocol/<br/>Composition</b>   | <b>Metal salt:<br/>H<sub>2</sub>ADC:DABCO<br/>(molar ratio)</b> | <b>Solvent<br/>(ml)</b> | <b>Temperature<br/>(°C) and<br/>duration (h)</b> | <b>BET<br/>surface<br/>area<br/>(m<sup>2</sup>/g)</b> |
|------------------------------------|-----------------------------------------------------------------|-------------------------|--------------------------------------------------|-------------------------------------------------------|
| <b>A(Cu-MOF)</b>                   | 1:1:0.8                                                         | 27                      | 150 and 48                                       | 444                                                   |
| <b>B</b>                           | 2:1:0.5                                                         | 27                      | 120 and 72                                       | 374                                                   |
| <b>C</b>                           | 1:1:0.8                                                         | 27                      | 120 and 72                                       | 537                                                   |
| <b>D(Hierarchical<br/>Cu-MOF)</b>  | 1:1:0.8                                                         | 90                      | 120 and 48                                       | 607                                                   |
| <b>E(Hierarchical Cu-<br/>MOF)</b> | 1:1:0.8                                                         | 70                      | 120 and 48                                       | 627.4                                                 |

## N<sub>2</sub> adsorption Isotherms

N<sub>2</sub> adsorption isotherms were conducted for all the compositions at 77 K and are displayed in Figure 1S. The N<sub>2</sub> adsorption isotherm of composition E is given in the main article.

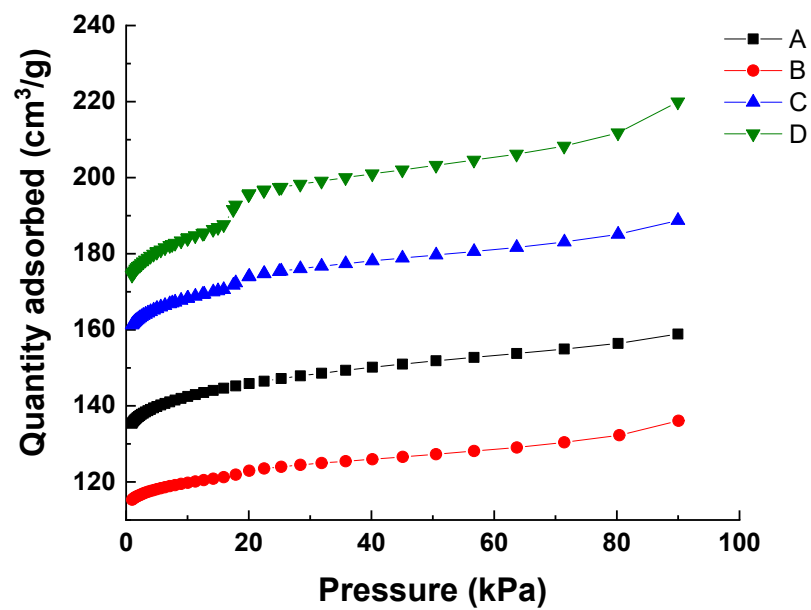

Figure 1S: N<sub>2</sub> adsorption isotherms for composition A (square, black), B(circle, red), C(triangle, blue) and D (inverted, olive green).

## Thermal stability

Thermogravimetric analysis of Cu-MOF and hierarchical-Cu-MOF is shown in Figure 2S.

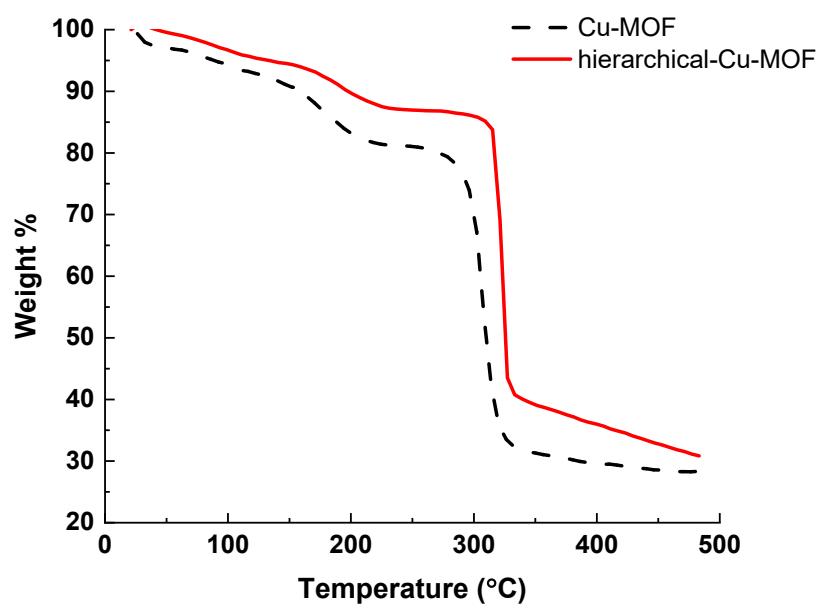

Figure 2S: Thermal gravimetric analysis of Cu-MOF, composition A (black, dashed line) and the hierarchical-Cu-MOF, composition E (red, solid line)

## MOF structure

The CIF file of activated  $Zn_2(adc)_2(dabco)$  MOF was obtained from the crystallographic database. The structure is simulated using Vesta software and is illustrated in Figure 3S.

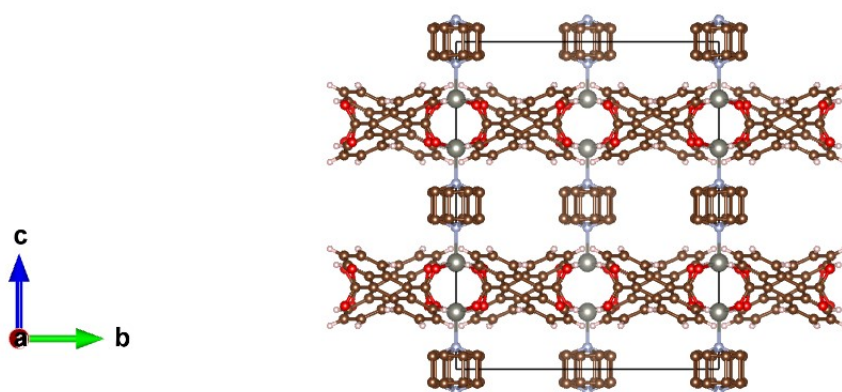

Figure 3S: Structure of  $Zn_2(adc)_2(dabco)$  MOF

Table 2S: Selectivities for the separation of  $CO_2$  from  $CO_2/N_2$  and  $CO_2/CH_4$  mixtures for hierarchical Cu-MOF and state-of-the art MOFs from literature

| <b>MOF Name</b>                  | <b>BET surface area (<math>m^2/g</math>)</b> | <b>Gas Mixture</b> | <b>Selectivity of <math>CO_2</math></b> | <b><math>CO_2</math> adsorption capacity</b> | <b>Temperature</b> | <b>Pressure</b> | <b>Reference</b> |
|----------------------------------|----------------------------------------------|--------------------|-----------------------------------------|----------------------------------------------|--------------------|-----------------|------------------|
| <b>Hierarchical Cu - MOF</b>     | 627.4                                        | $CO_2/N_2$         | 12                                      | 75 mg/g                                      | 295 K              | 1 bar           | This work        |
|                                  |                                              | $CO_2/CH_4$        | 3                                       |                                              |                    |                 |                  |
| <b>IRMOF-3</b>                   | 2350                                         | $CO_2/N_2$         | 18                                      | 54 mg/g                                      | 298 K              | 1 bar           | [1]              |
| <b>HKUST-1</b>                   | 2211                                         | $CO_2/CH_4$        | 9                                       | 352.1 mg/g                                   | 303 K              | 10 bar          | [2]              |
|                                  | 1948                                         | $CO_2/N_2$         | 36                                      | 484 mg/g                                     | 273K               | 1 bar           | [3]              |
| <b><math>Cu_2(Hbtb)_2</math></b> | 600                                          | $CO_2/CH_4$        | 12.4                                    | 66 mg/g                                      | 298 K              | 1 bar           | [4]              |
| <b>ZnDABCO</b>                   | 1725                                         | $CO_2/N_2$         | 17                                      | 440 mg/g                                     | 298 K              | 15 bar          | [5]              |
| <b>MIL-101</b>                   | 1007                                         | $CO_2/CH_4$        | 6                                       | 269 mg/g                                     | 298 K              | 10 bar          | [6]              |
| <b>UiO-66</b>                    | 1123                                         | $CO_2/N_2$         | 61.5                                    | 52 mg/g                                      | 308 K              | 2 bar           | [7]              |
|                                  |                                              | $CO_2/CH_4$        | 18.3                                    |                                              |                    |                 |                  |

## References:

1. Y. R. Lee, S. M. Cho, W. S. Ahn, C. H. Lee, K. H. Lee and W. S. Cho, *Microporous Mesoporous Mater.*, 2015, **213**, 161–168.
2. L. Hamon, JolimaîtreE. and G. D. Pirngruber, *Ind. Eng. Chem. Res.*, 2010, **49**, 7497–7503.
3. X. Yan, S. Komarneni, Z. Zhang and Z. Yan, *Microporous and Mesoporous Mater.*, 2014, **183**, 69–73.
4. B. Mu, F. Li and K. S. Walton, *Chem. Comm.*, 2009, 2493.
5. Z. Liang, M. Marshall and A. L. Chaffee, *Microporous and Mesoporous Mater.*, 2010, **132**, 305–310.
6. M. Babaei, S. Salehi, M. Anbia and M. Kazemipour, *J. Chem. Eng. Data*, 2018, **63**, 1657–1662.
7. G. E. Cmarik, M. Kim, S. M. Cohen and K. S. Walton, *Langmuir*, 2012, **28**, 15606–15613.
